# Supplementary material
Source: publisher figshare collection journal article supplement (https://acs.figshare.com/ndownloader/files/4676962)
Supplement: Supplementary file 1 [file 4676962]

## Supporting Information

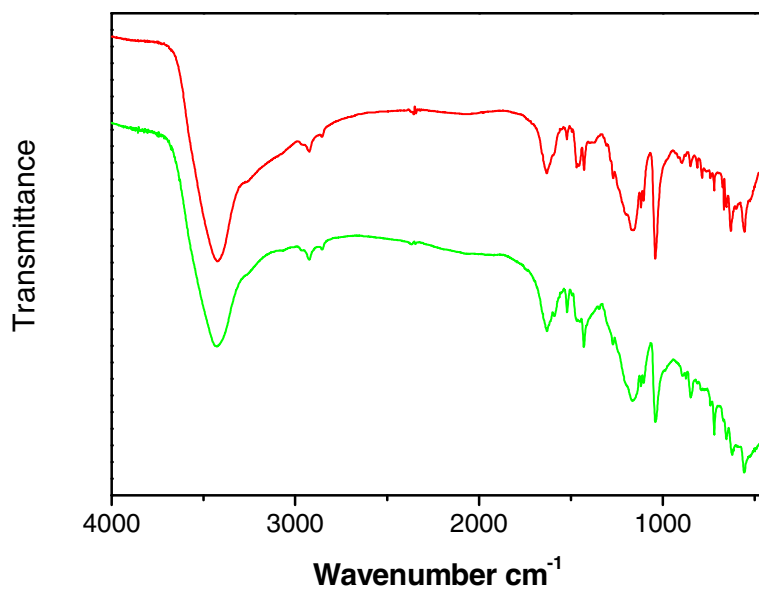

Figure S1. IR-Spectra of **1** (in red) and **2** (in green).

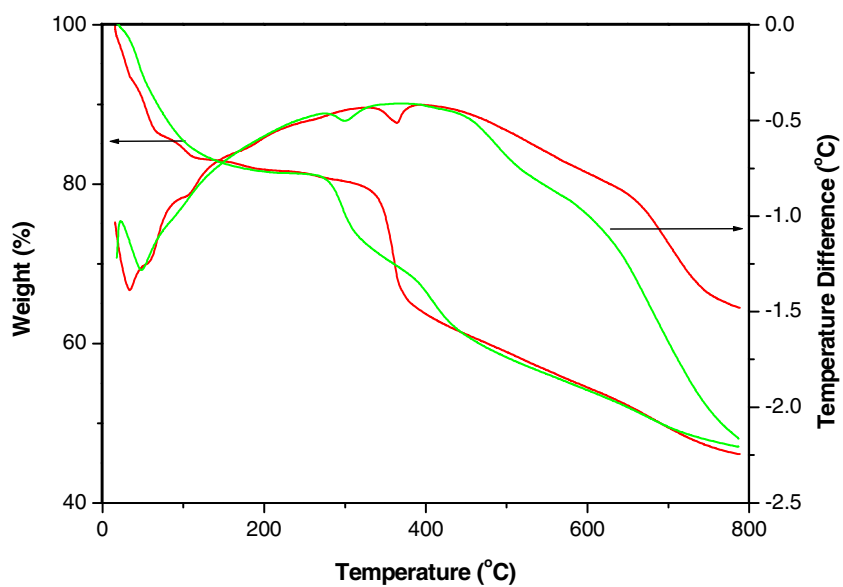

Figure S2. TG-DTA analysis data of **1** (in red) and **2** (in green) measured in the N<sub>2</sub> flow.

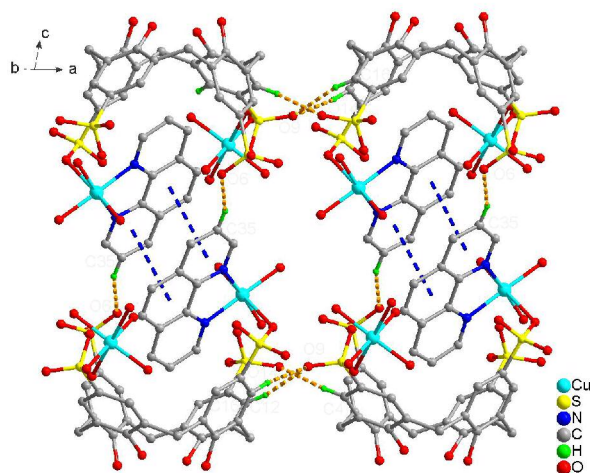

Figure S3. Two capsules shoulder-by-shoulder arranged along the  $a$  axis and the hydrogen bonds interconnecting them in **1**.

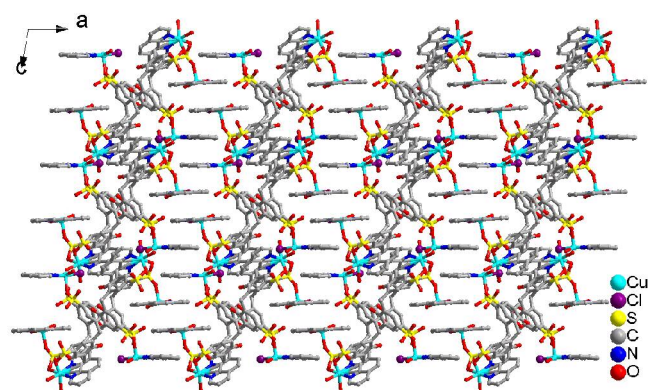

Figure S4. Crystal structure of **2** viewed along the  $b$  axis showing the  $\pi$ -stacked phenanthroline column.

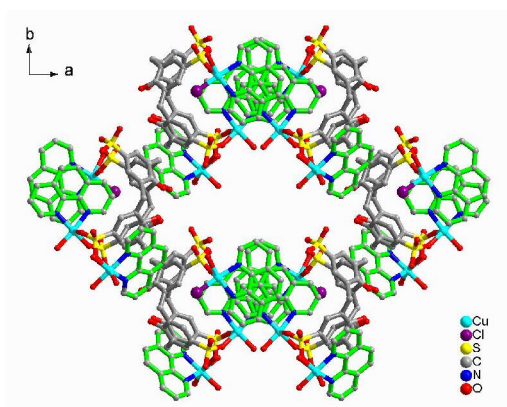

Figure S5. The surrounding environment of C4AS in **2** with the phenanthroline molecules in green and calixarene in grey.
